# Supplementary material for: Development and Validation of the Epidemiological Tattoo Assessment Tool to Assess Ink Exposure and Related Factors in Tattooed Populations for Medical Research: Cross-sectional Validation Study
Source: PubMed Central journal article supplement (PMC9878366; doi:10.2196/42158), 2023-01-11

## **Multimedia Appendix 1**

**Pictures used in the “Body schemes” test questionnaire**

Head

Left: Participants indicated to have rather small tattoos

Right: Participants indicated to have rather large tattoos

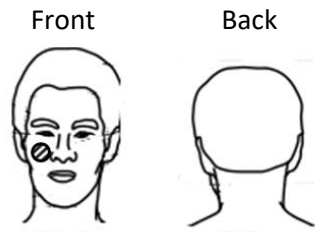

A

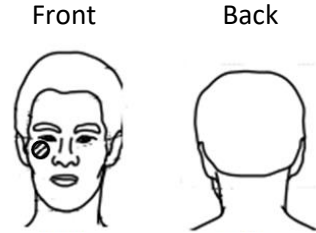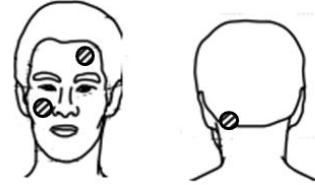

B

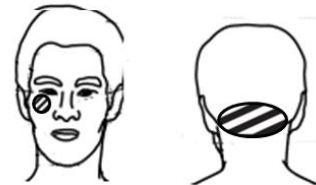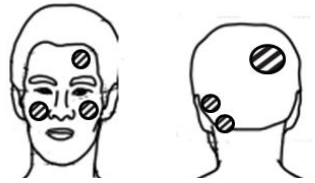

C

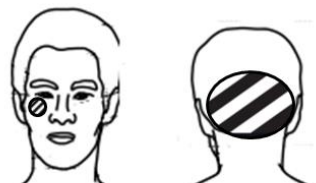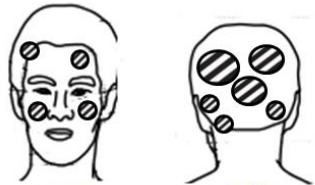

D

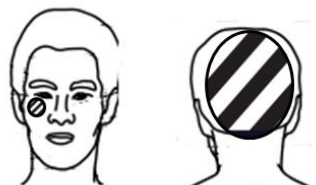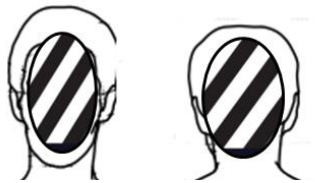

E

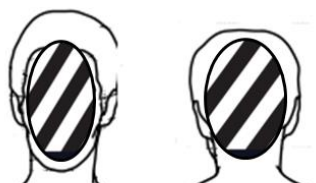

Shoulders / Décolleté

Left: Participants indicated to have rather small tattoos

Right: Participants indicated to have rather large tattoos

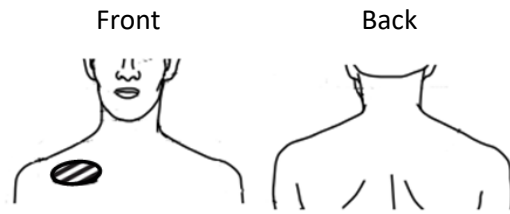

A

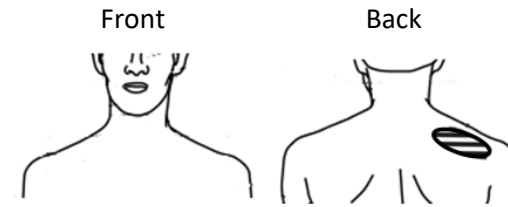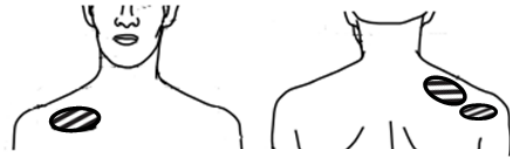

B

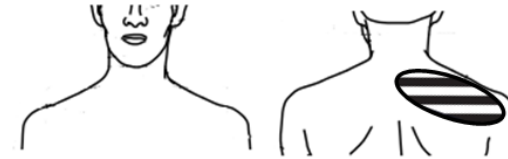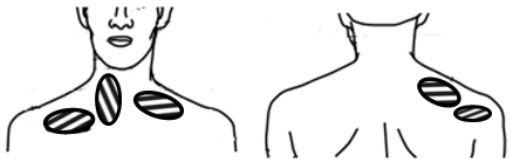

C

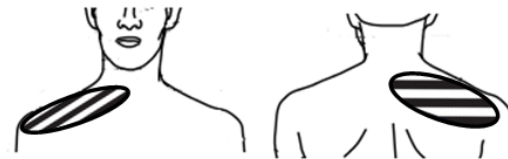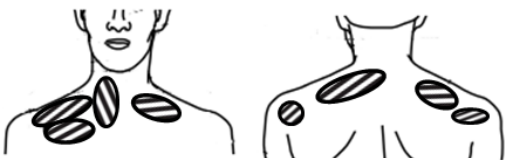

D

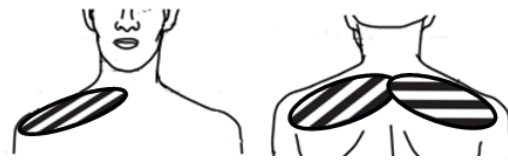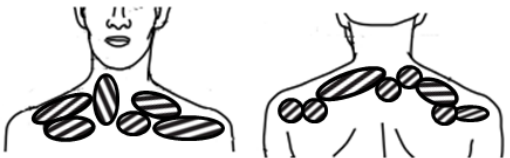

E

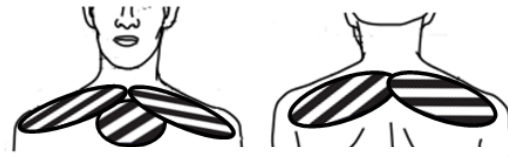

Belly / chest / sides

Left: Participants indicated to have rather small tattoos

Right: Participants indicated to have rather large tattoos

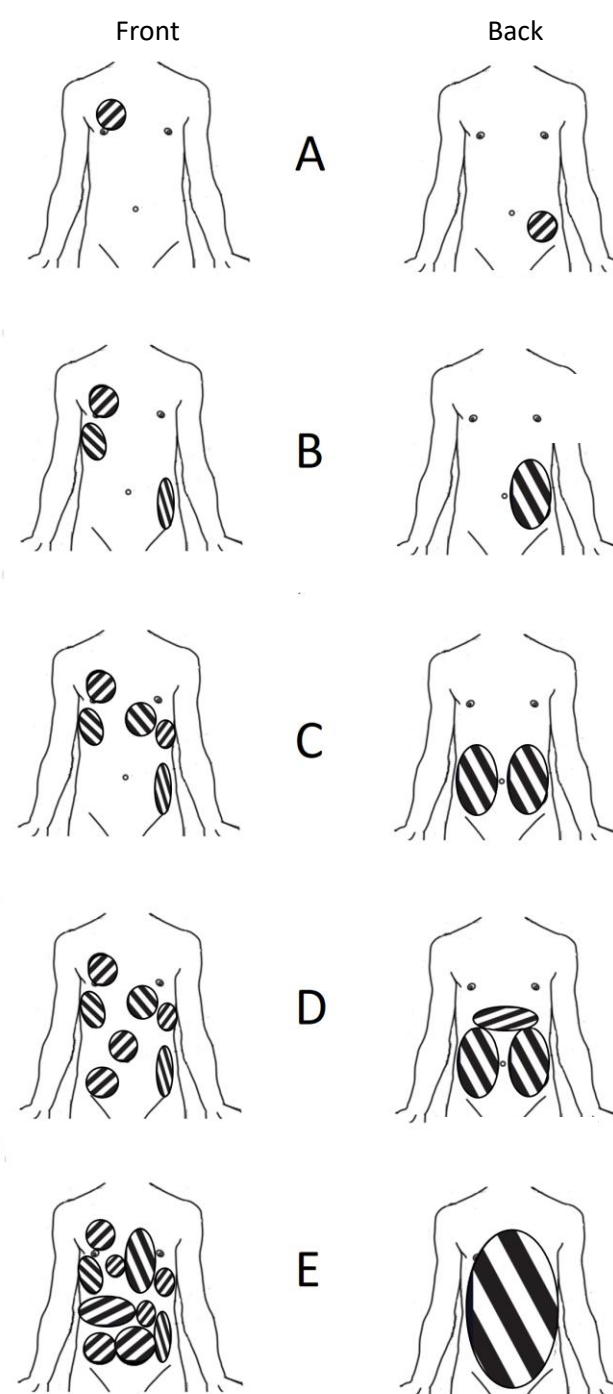

Back

Left: Participants indicated to have rather small tattoos

Right: Participants indicated to have rather large tattoos

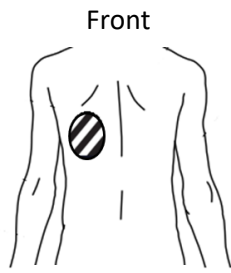

A

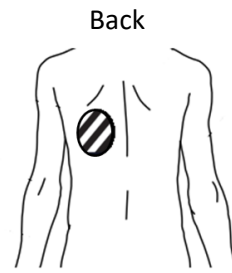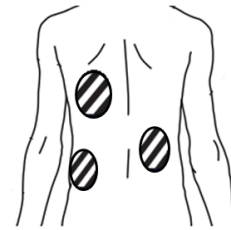

B

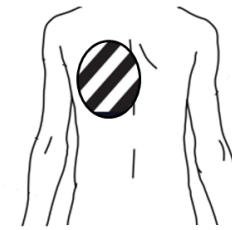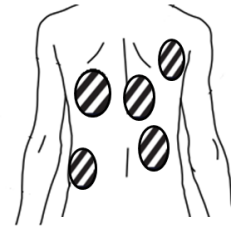

C

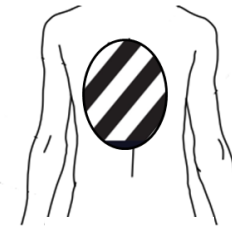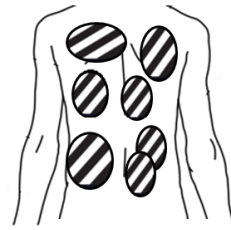

D

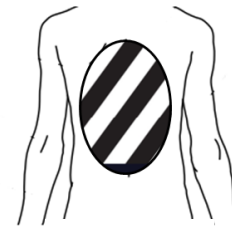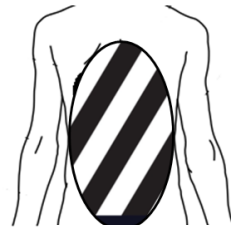

E

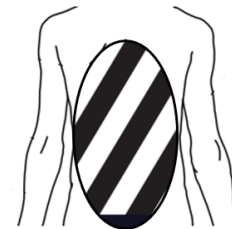

Left arm / hand  
(Right arm corresponding)

Left: Participants indicated to have rather small tattoos

Right: Participants indicated to have rather large tattoos

Front

Back

Front

Back

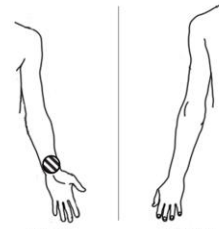

A

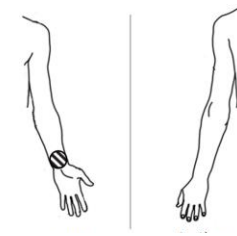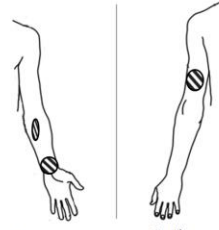

B

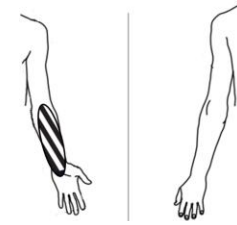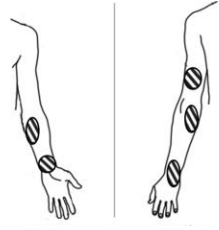

C

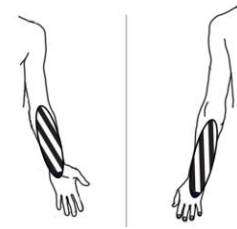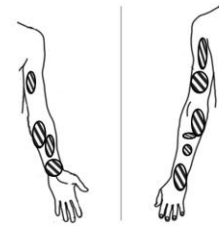

D

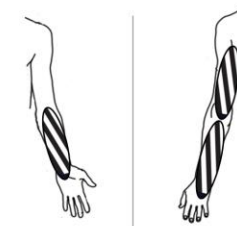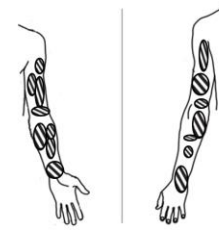

E

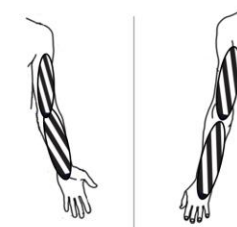

Left thigh  
(Right thigh corresponding)

Left: Participants indicated to have rather small tattoos

Right: Participants indicated to have rather large tattoos

Front Back

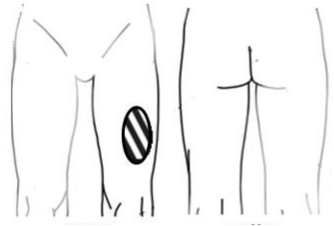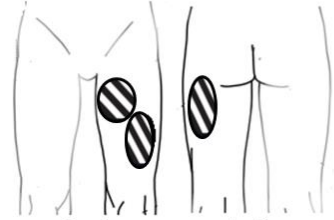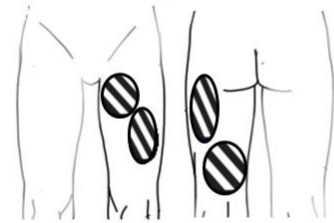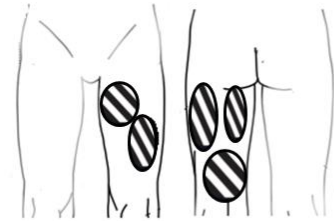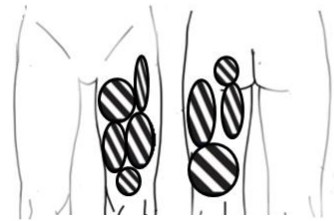

Front Back

A

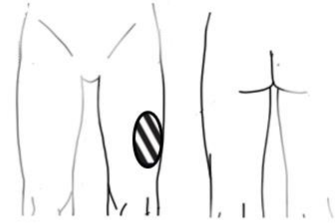

B

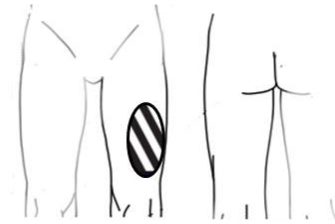

C

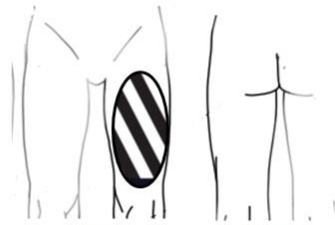

D

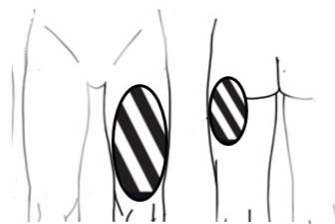

E

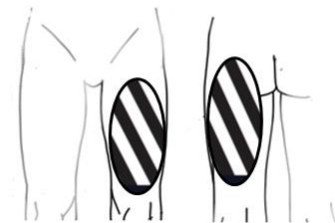

Right lower leg  
(Left lower leg corresponding)

Left: Participants indicated to have rather  
small tattoos

Right: Participants indicated to have rather  
large tattoos

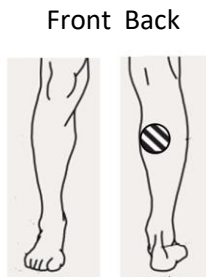

A

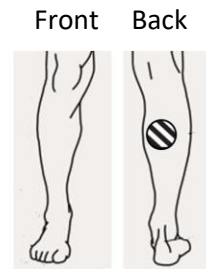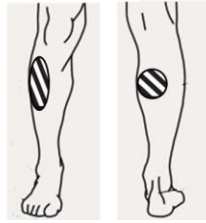

B

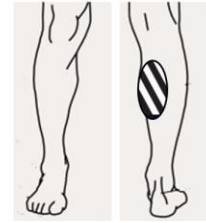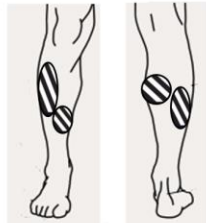

C

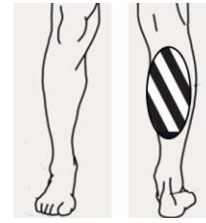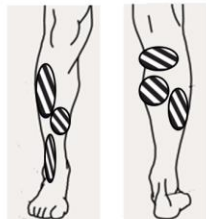

D

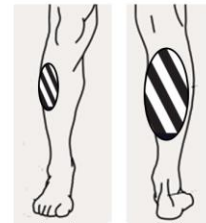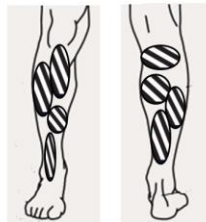

E

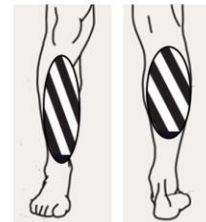



Feet

Left: Participants indicated to have rather small tattoos

Right: Participants indicated to have rather large tattoos

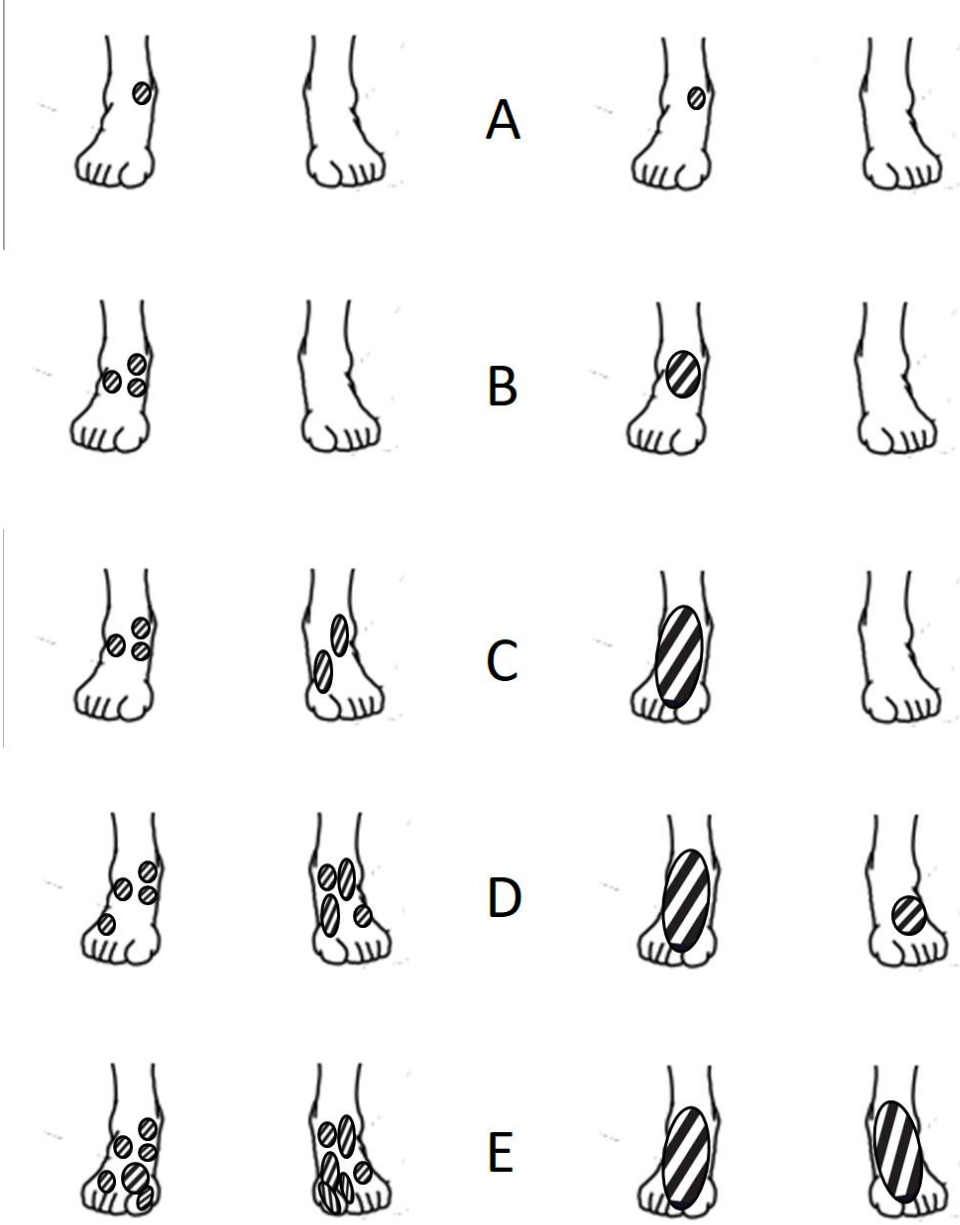

Supplement: formative_v7i1e42158_app1.pdf [file formative_v7i1e42158_app1.pdf]
