# Supplementary material for: Development and Validation of the Epidemiological Tattoo Assessment Tool to Assess Ink Exposure and Related Factors in Tattooed Populations for Medical Research: Cross-sectional Validation Study
Source: PubMed Central journal article supplement (PMC9878366; doi:10.2196/42158), 2023-01-11

**Multimedia Appendix 3: Supplementary tables and figures.**

Table S1. Study population profile, overall and by questionnaire version.

|                                             | <b>All</b>  | <b>Hand surface</b> | <b>Credit Card</b> | <b>Body Schemes</b> |
|---------------------------------------------|-------------|---------------------|--------------------|---------------------|
|                                             | Mean (SD)   | Mean (SD)           | Mean (SD)          | Mean (SD)           |
| <b>Female (n (%))</b>                       |             |                     |                    |                     |
|                                             | 65 (67%)    | 20 (63%)            | 23 (70%)           | 22 (69%)            |
| Age                                         |             |                     |                    |                     |
|                                             | 25.5 (4.8)  | 26.1 (5.6)          | 24.3 (3.5)         | 26.1 (5.2)          |
| Height                                      |             |                     |                    |                     |
|                                             | 1.65 (0.1)  | 1.65 (0.1)          | 1.64 (0.1)         | 1.66 (0.7)          |
| Weight                                      |             |                     |                    |                     |
|                                             | 60.4 (10.2) | 59.8 (9.1)          | 61.5 (9.2)         | 59.9 (12.3)         |
| Total body surface (m <sup>2</sup> )        |             |                     |                    |                     |
|                                             | 1.59 (0.16) | 1.59 (0.13)         | 1.59 (1.39)        | 1.6 (0.21)          |
| <b>Male (n (%))</b>                         |             |                     |                    |                     |
|                                             | 32 (33%)    | 12 (38%)            | 10 (30%)           | 10 (31%)            |
| Age                                         |             |                     |                    |                     |
|                                             | 30.5 (7.4)  | 30.7 (7.3)          | 30.7 (9.0)         | 30.1 (6.2)          |
| Height                                      |             |                     |                    |                     |
|                                             | 1.78 (0.1)  | 1.78 (0.1)          | 1.8 (0.5)          | 1.8 (0.1)           |
| Weight                                      |             |                     |                    |                     |
|                                             | 79.6 (13)   | 82.8 (18.2)         | 77.7 (10.5)        | 77 (6.7)            |
| Total body surface (m <sup>2</sup> )        |             |                     |                    |                     |
|                                             | 1.89 (0.16) | 1.9 (0.2)           | 1.88 (0.13)        | 1.9 (0.12)          |
| <b>Number of tattoos<br/>(median (IQR))</b> |             |                     |                    |                     |
|                                             | 5 (2;9)     | 6 (3;11)            | 4 (2;7)            | 5 (2;10)            |

Figure S1: Single plots of total tattooed body surface ( $\text{cm}^2$ ) for the three different test measurement units. Self-assessment measures are plotted against the corresponding size measured during validation. Due to the left-skewed distribution of tattoo size, values are plotted on logscale.

---

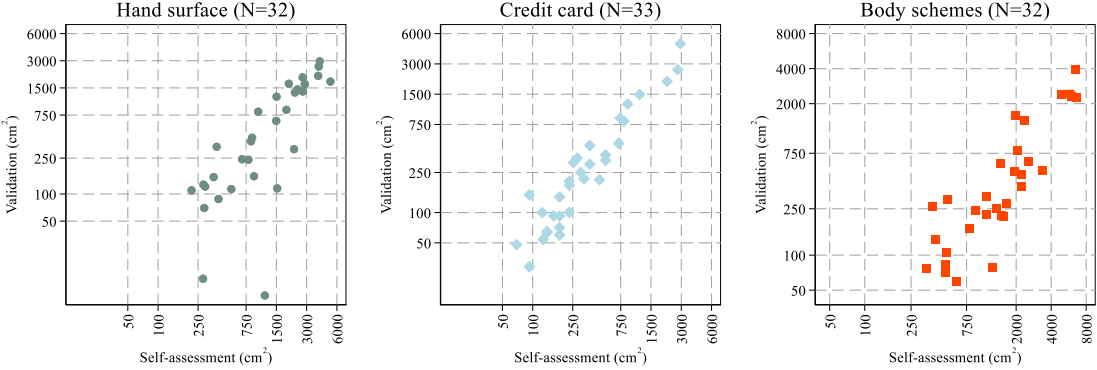

Figure S2: Scatterplot of self-assessed vs. validated surface of all black/greywash colours combined ( $\text{cm}^2$ ) measured by three different test measurement units in the subpopulation with colored tattoos in the validation study. Due to the left-skewed distribution of tattoo size, values are plotted on logscale

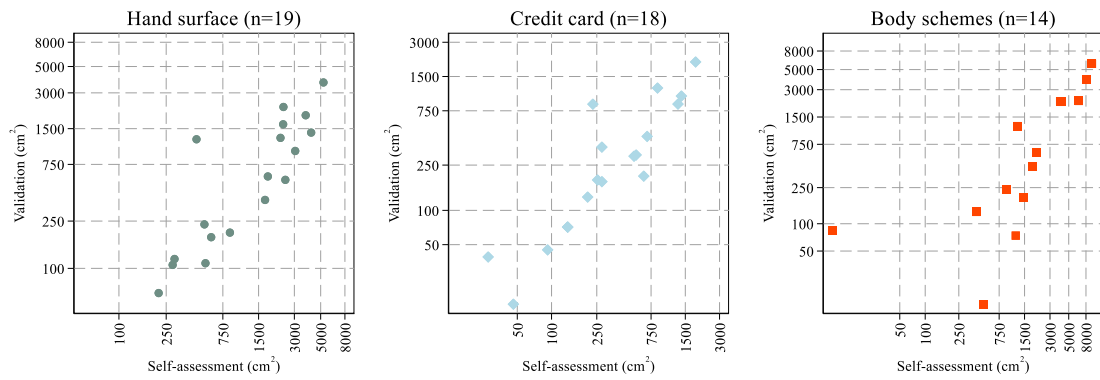

Figure S3: Bland-Altman plots (difference plots) of validation vs. self-assessment of the black/greywash surface per measurement unit in the subpopulation with colored tattoos. Measurement points lying outside the grey shaded area are outside the limits of agreement ( $\pm 1.96$  SD)

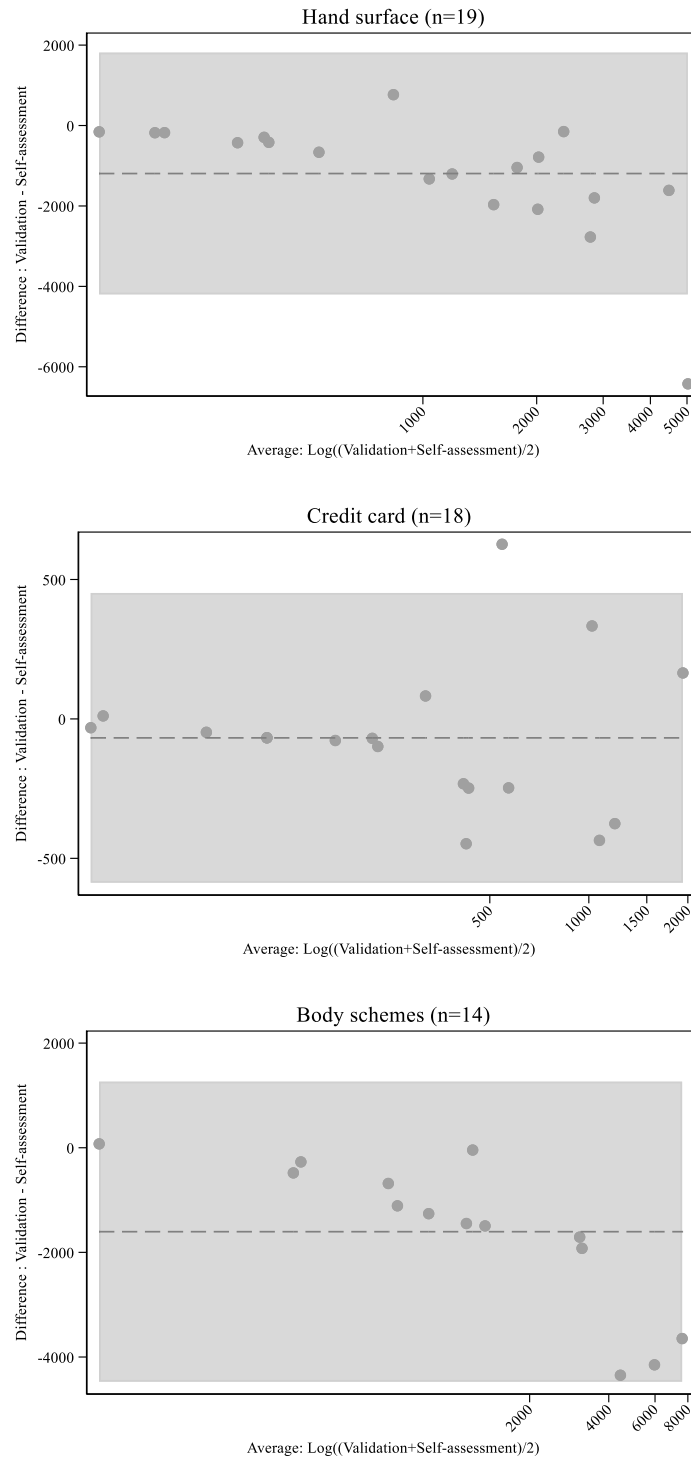

Figure S4: Scatterplot of self-assessed vs. validated surface of all colors (non-black/greywash) combined ( $\text{cm}^2$ ) measured by three different test measurement units in the subpopulation with colored tattoos in the validation study. Due to the left-skewed distribution of tattoo size, values are plotted on logscale

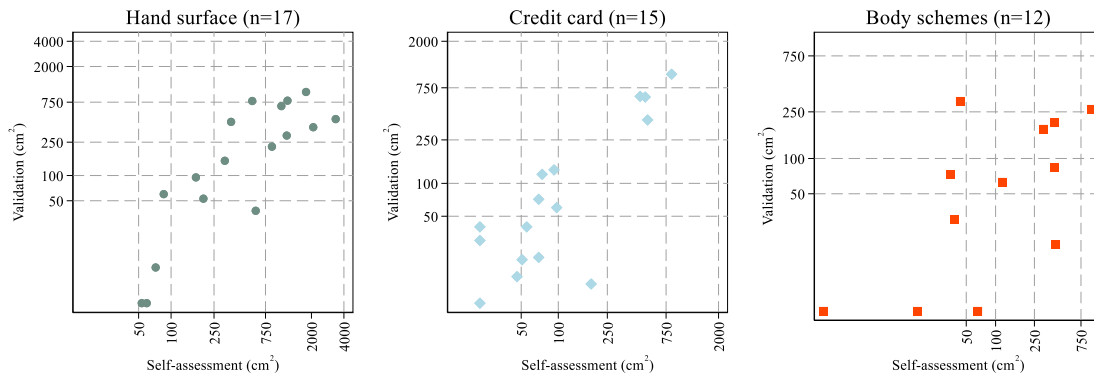

Figure S5: Bland-Altman plots (difference plots) of validation vs. self-assessment of the colored (non-black/greywash) surface per measurement unit in the subpopulation with colored tattoos. Measurement points lying outside the grey shaded area are outside the limits of agreement ( $\pm 1.96$  SD)

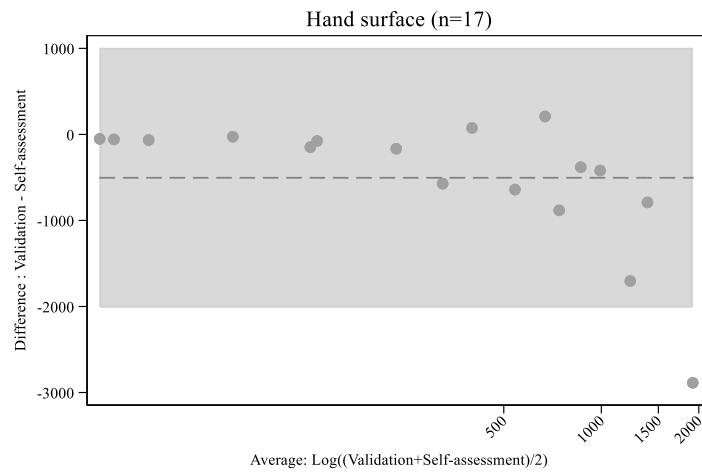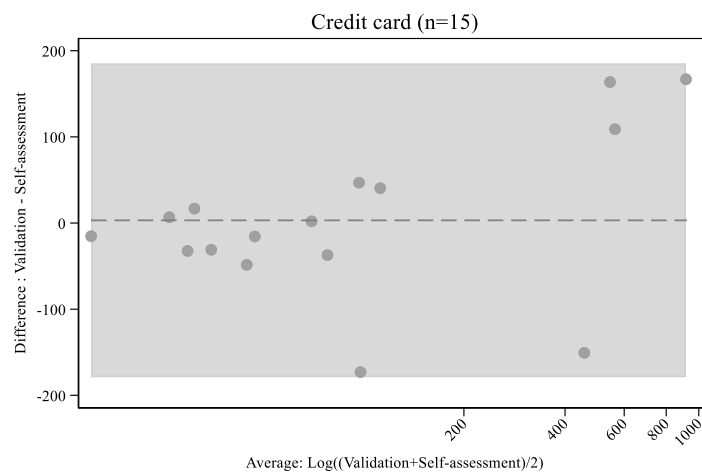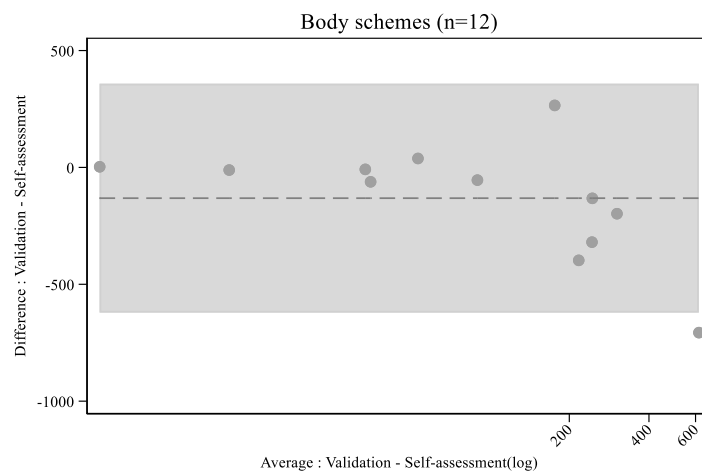

Figure S6: Scatterplots of assigned ranks of validated vs. self-assessed surface for all black/greywash colours combined for the different measurement units in the subpopulation with colored tattoos.

---

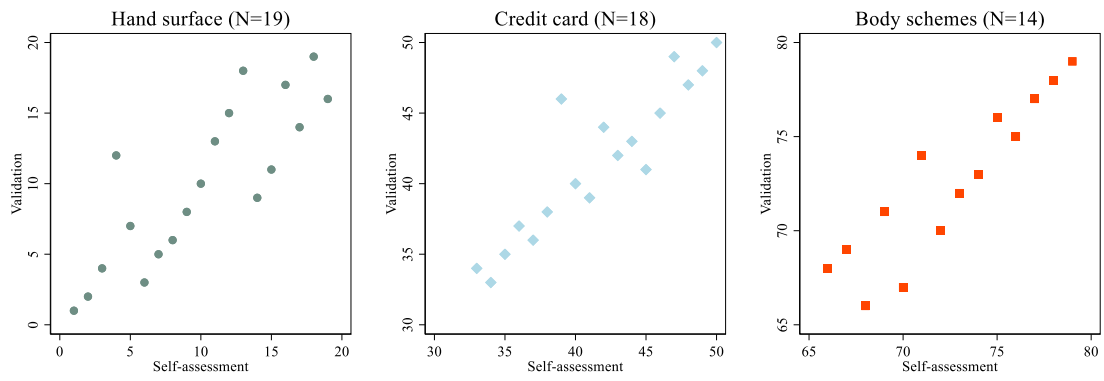



Figure S7: Scatterplots of assigned ranks of validated vs. self-assessed surface for all colors (non-black/greywash) combined for the different measurement units in the subpopulation with colored tattoos.

---

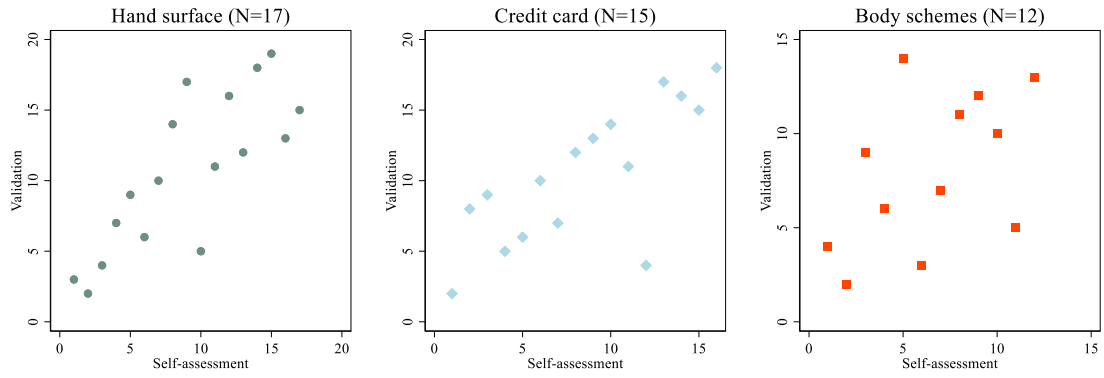

Figure S8. Scatterplot of self-assessed vs. validated coverage proportions via three different test measurement units in all participants in the validation study (n=97)

---

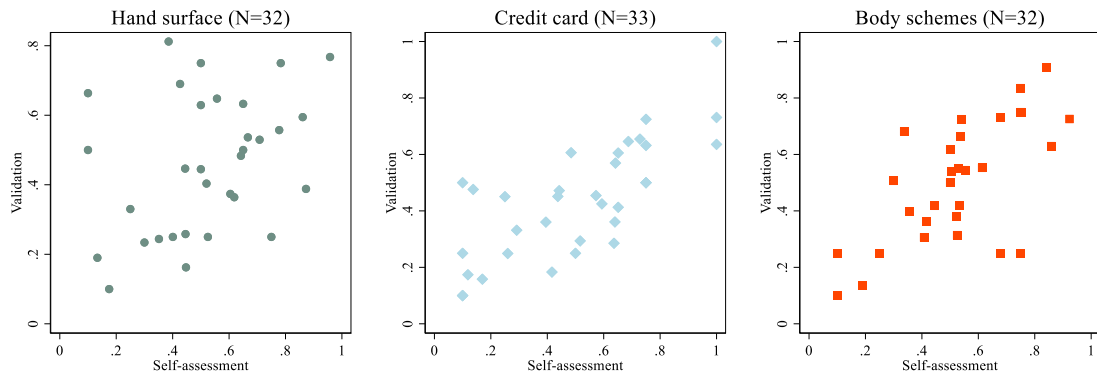

Figure S9. Bland-Altman plots (difference plots) of validation vs self-assessment of total tattoo coverage for three different measurement units in all participants in the validation study (n=97). Measurement points lying outside the grey shaded area are outside the limits of agreement ( $\pm 1.96$  SD)

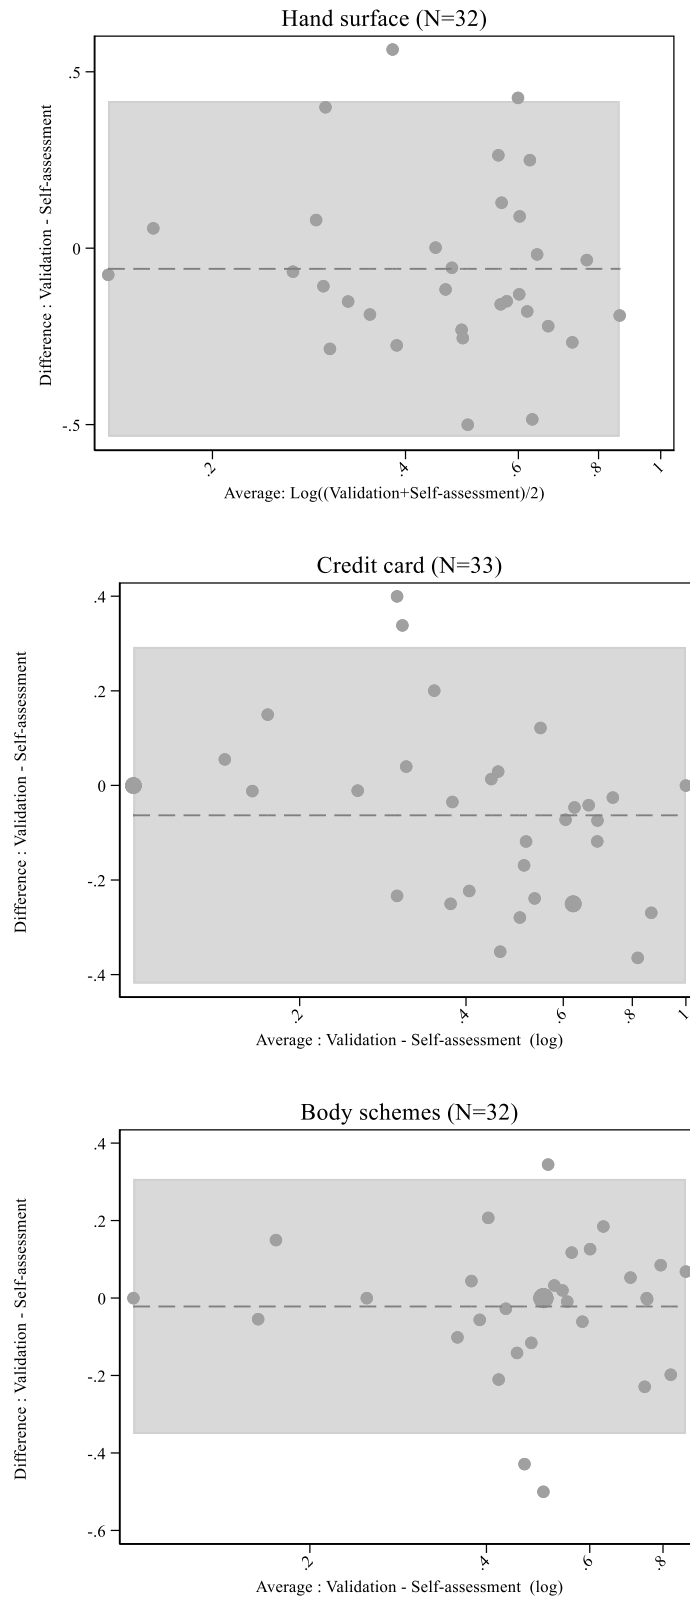

Figure S10: Scatterplots of assigned ranks of validated vs. self-assessed tattoo coverage for the different measurement units in all participants in the validation study (n=97).

---

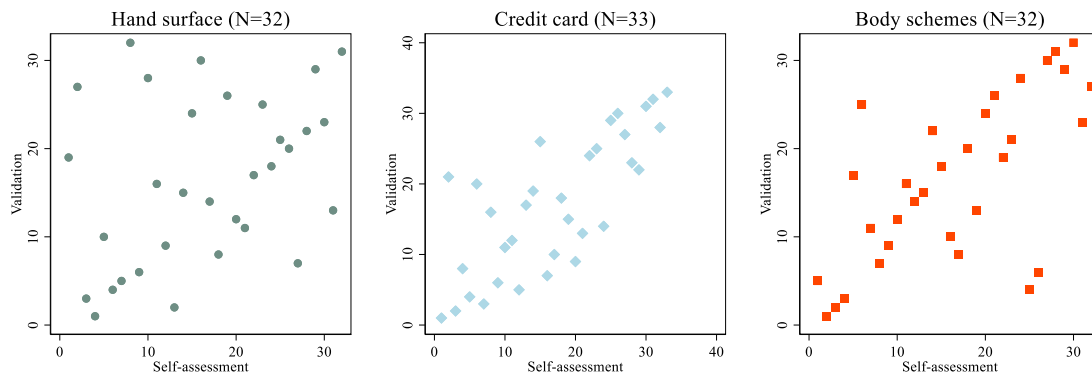

Figure S11: Scatterplots of assigned ranks of tattoo surface for 62 tattoos whose surface was measured during the validation study and digitally analysed via Fiji/ImageJ.

---

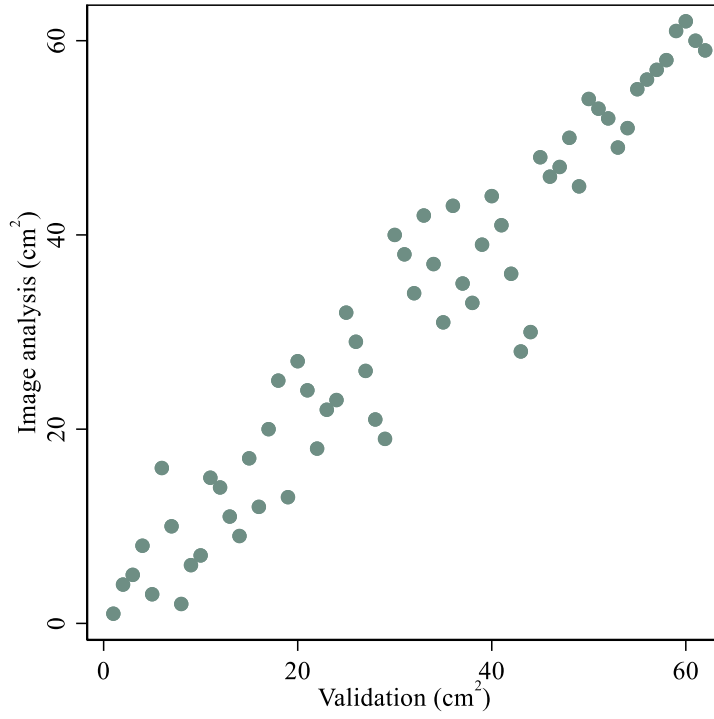

Figure S12 : Scatterplot of individual tattoo surface for black/greywash surfaces for 23 of 24 coloured tattoos (one did not use black/greywash ink) whose surface was measured during the validation study and digitally analysed via Fiji/ImageJ.

---

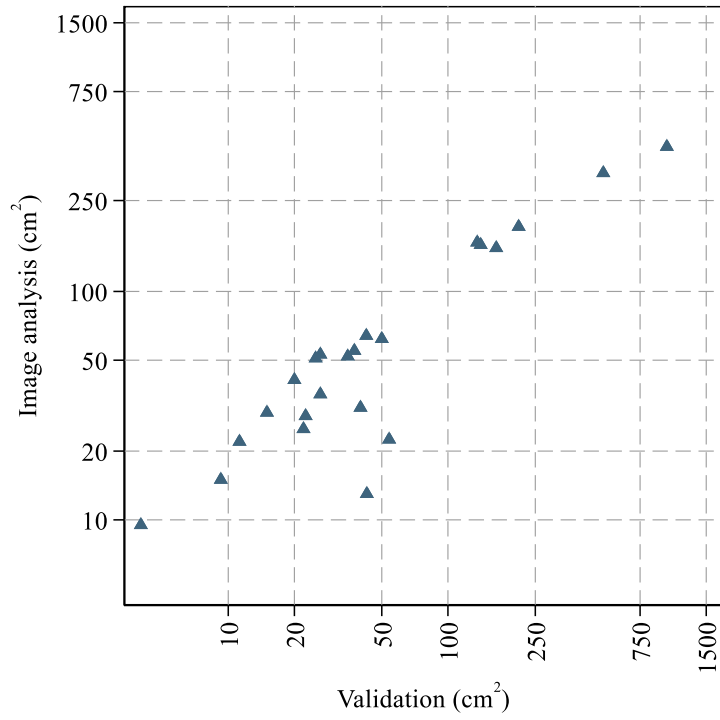

Figure S13: Scatterplot of individual tattoo surface for coloured (non-black/greywash) surfaces for 24 coloured tattoos surface was measured during the validation study and digitally analysed via Fiji/ImageJ.

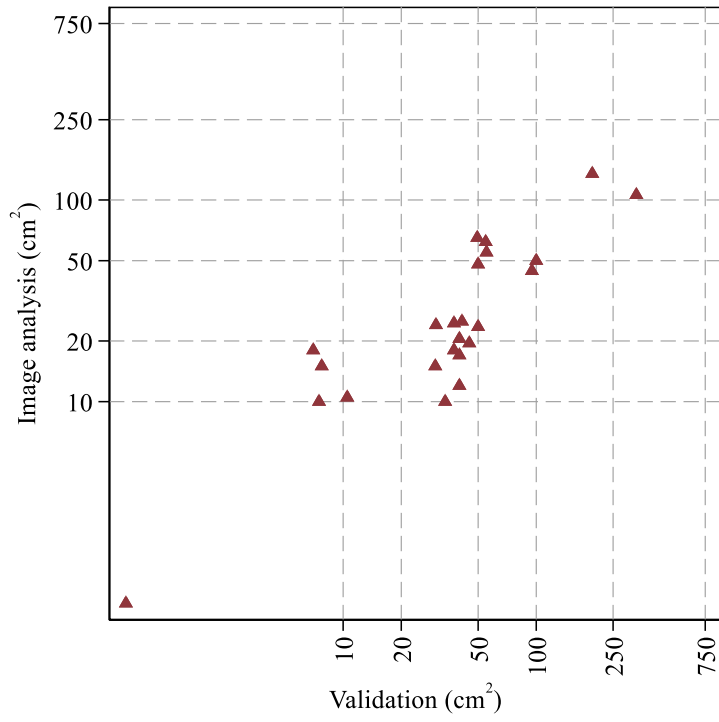

Supplement: formative_v7i1e42158_app3.pdf [file formative_v7i1e42158_app3.pdf]
